# Supplementary material for: Moisture diffusivity of medicinal and aromatic plants during convective drying by hot air: Myrtle leaves
Source: Research Square preprint supplement (doi:10.21203/rs.3.rs-2219589/v1), 2022-11-04
Supplement: Supplementary file 1 [file 7bf8cfcb9916090b9388aa33.docx]

**TABLE. 1**

| **Solutions**  **salts** | **40** | **45** | **T (°C)**  **50** | **55** | **60** |
| --- | --- | --- | --- | --- | --- |
| **KOH**  **LiCl**  **MgCl2**  **K2CO3**  **NaBr**  **NaNO3**  **NaCl**  **KCl**  **BaCl2** | 0,062  0,112  0,325  0,431  0,514  0,589  0,721  0,778  0,891 | 0,061  0,114  0,312  0,429  0,513  0,589  0,72  0,778  0,89 | 0,057  0,111  0,305  0,427  0,512  0,588  0,718  0,777  0,889 | 0,056  0,111  0,3  0,425  0,489  0,572  0,71  0,76  0,88 | 0,055  0,111  0,292  0,421  0,441  0,56  0,703  0,751  0,872 |

**TABLE. 2**

| **Model Name** | **Equations** |
| --- | --- |
| **BET** |  |
| **Oswin** |  |
| **GAB** |  |
| **Henderson** |  |
| **Peleg** |  |

**TABLE. 3**

| **Models** | **Temperature**  **T° (C)** |  | | **Parameters** |
| --- | --- | --- | --- | --- |
|  |  |
| **GAB** | **40°C** | 0,99572445 | 0,01226743 | a=29,1416 b=0,0068 c=0,9262 |
| **45°C** | 0,99688411 | 0,01328964 | a=6,700 b=0,1516 c=0,84828 |
| **50°C** | 0,99563491 | 0,00962815 | a=1,136 b=0,09599 c=0,8923 |
| **55°C** | 0,99427161 | 0,00894643 | a=1,4471 b=0,10028 c=0,8817 |
| **60°C** | 0,99551844 | 0,00907091 | a=1,2151 b=0,1306 c=0,8613 |
| **BET** | **40°C** | 0,99572414 | 0,01124034 | a=-1,1105 b=0,1955 |
| **45°C** | 0,99612411 | 0,01224043 | a=0,5691 b=0,1864 |
| **50°C** | 0,9942211 | 0,01024012 | a=-0,9566 b=0,3682 |
| **55°C** | 0,99612454 | 0,01367023 | a=-0,2737 b=0,4328 |
| **60°C** | 0,99665453 | 0,01224066 | a=0,1448 b=0,4940 |
| **Oswin** | **40°C** | 0,99183083 | 0,01643265 | a=0,2464 b=0,3505 |
| **45°C** | 0,9943452 | 0,00868064 | a= 0,1285 b= 0,6442 |
| **50°C** | 0,99434113 | 0,01085242 | a=0,2159 b=0,6409 |
| **55°C** | 0,9955252 | 0,00872987 | a= 0,0673 b= 0,7906 |
| **60°C** | 0,9962352 | 0,01160064 | a=0,1968 b=0,3336 |
| **Henderson** | **40°C** | 0,96901327 | 0,03550864 | a=8,4669 b=1,8429 |
| **45°C** | 0,98093667 | 0,01772093 | a=11,8891 b=2,0210 |
| **50°C** | 0,96804788 | 0,01325971 | a=15,7776 b=2,1010 |
| **55°C** | 0,97993667 | 0,01892099 | a=16,0211 b=2,1203 |
| **60°C** | 0,97893667 | 0,01222087 | a=16,9291 b=2,0898 |
| **Peleg** | **40°C** | **0,99718012** | **0,00943538** | **a=0,1502** **b=0,4738 c=0,7090** **d=6,0073** |
| **45°C** | **0,99816591** | **0,00740291** | **a=0,3229** **b=0,2478 c=5,8315** **d=0,3978** |
| **50°C** | **0,99801884** | **0,00754293** | **a=0,2703** **b=0,3366**  **c=0,4902** **d=4,1300** |
| **55°C** | **0,99780591** | **0,00817456** | **a=0,4882** **b=4,9157**  **c=0,0567** **d=0,5214** |
| **60°C** | **0,99886547** | **0,00964059** | **a=0,0603** **b=0,6816**  **c=0,4509** **d=5,7064** |

**TABLE. 4**

| **T(°C)** | **40** | **45** | **50** | **55** | **60** |
| --- | --- | --- | --- | --- | --- |
| **(×10−10 m2/s)** | 1,266 | 2,052 | 3,57 | 8,121 | 13,06 |
| **(kJ/mol)** |  | 104,63 |  |  |  |
| **(×10−2 m2/s)** |  | 5,1 |  |  |  |
|  |  | 0,545 |  |  |  |

**TABLE. 5**

| **Product** | **Activation Energy** | **References** |
| --- | --- | --- |
| **Myrtus Communis** | 104,63 | Present work |
| **Mint** | 82,93 | Park et al, [7] |
| **Black tea** | 406,02 | Panchariya et al [8] |
| **Laurus Nobilis** | 36,48 | I, Doymaz [9] |
